# Supplementary material for: Lived experience in human-building interaction (HBI): an initial framework
Source: Frontiers journal article supplement (doi:10.3389/fcomp.2023.1233904), 2024-01-04
Supplement: Data_Sheet_4.PDF [file Data_Sheet_4.PDF]

# Codebook

[Blided ] evaluation.mx22

20.03.23

## Code System

|                                                          |    |
|----------------------------------------------------------|----|
| 1 Artefact benefits/drawbacks                            | 0  |
| 1.1 magic                                                | 1  |
| 1.2 needed torches/lamps                                 | 2  |
| 1.3 furnished the space with upholstery and billows      | 3  |
| 1.4 build a house                                        | 4  |
| 1.5 build a castle                                       | 2  |
| 1.6 conflicting needs                                    | 1  |
| 1.7 police station                                       | 1  |
| 1.8 hiding place                                         | 1  |
| 1.9 role-playing                                         | 1  |
| 1.10 better fitted for the gym                           | 1  |
| 1.11 no storage space                                    | 1  |
| 1.12 shelves work better as partitions                   | 1  |
| 1.13 not for everyday                                    | 1  |
| 1.14 not so sound proofing                               | 1  |
| 1.15 adding other toys to them                           | 1  |
| 1.16 useful but take up a lot of space                   | 1  |
| 1.17 build caves                                         | 4  |
| 1.18 not well functioning                                | 1  |
| 1.19 inconsistency                                       | 1  |
| 1.20 bulky                                               | 5  |
| 1.21 lack of space                                       | 3  |
| 1.22 noise absorbent                                     | 4  |
| 1.23 used for building                                   | 2  |
| 1.24 child reluctant/afraid to go near in the beginning  | 1  |
| 1.25 collapsible                                         | 1  |
| 2 Conflict                                               | 1  |
| 2.1 exclusion                                            | 2  |
| 2.1.1 preventing exit                                    | 0  |
| 2.1.1.1 imprisonment                                     | 4  |
| 2.1.2 preventing or obstructing interaction (entry/exit) | 26 |
| 2.1.2.1 pulling /pushing someone out                     | 4  |
| 2.2 designated use                                       | 0  |
| 2.2.1 undoing/correcting another child's action          | 5  |
| 2.3 kicking object                                       | 1  |
| 2.4 sense of ownership                                   | 25 |
| 2.4.1 trespassing                                        | 0  |

|                                                       |     |
|-------------------------------------------------------|-----|
| 2.4.1.1 physical conflict                             | 28  |
| 2.4.1.2 border protection                             | 19  |
| 2.4.1.3 border "breach"                               | 13  |
| 2.4.1.3.1 shaking boards                              | 2   |
| 2.4.2 attempt at taking object from another child     | 2   |
| 2.4.3 throwing object at/away from child              | 2   |
| 3 Interaction with placemaking artefact               | 0   |
| 3.1 resting head on board                             | 3   |
| 3.2 gathering connectors                              | 17  |
| 3.3 placing object over the boards                    | 41  |
| 3.4 placing boards around the projection arefact      | 1   |
| 3.5 moving board across the room                      | 2   |
| 3.6 disconnecting the boards                          | 1   |
| 3.7 bending over a board                              | 7   |
| 3.8 touching the foam                                 | 3   |
| 3.9 reaching between/over the boards                  | 5   |
| 3.10 moving connectors                                | 34  |
| 3.11 removing connectors                              | 13  |
| 3.12 stacking connectors                              | 26  |
| 3.13 pushing the board                                | 131 |
| 3.14 connecting boards together                       | 83  |
| 3.15 lifting and carrying the boards                  | 173 |
| 3.16 passing on / throwing object over or under board | 18  |
| 4 Interaction with projection artefact                | 0   |
| 4.1 placing markers in a row                          | 4   |
| 4.2 looking at projector                              | 5   |
| 4.3 throwing on floor                                 | 1   |
| 4.4 combining boards and markers                      | 27  |
| 4.5 giving markers to another child                   | 1   |
| 4.6 laying down in/ next to the projection            | 6   |
| 4.7 jumping into projection                           | 1   |
| 4.8 stacking markers                                  | 3   |
| 4.9 moving body/walking over the projection           | 10  |
| 4.10 standing in projection                           | 13  |
| 4.11 placing object in projected area                 | 36  |
| 4.12 sitting on projection                            | 16  |
| 4.13 moving hand over projection                      | 11  |
| 4.14 touching markers                                 | 41  |
| 4.15 moving markers around                            | 97  |
| 4.16 touching projection                              | 7   |

|                                      |     |
|--------------------------------------|-----|
| 5 Modality                           | 1   |
| 5.1 bodily manipulation of an object | 0   |
| 5.1.1 fine motoric movement          | 0   |
| 5.1.1.1 interaction using hands      | 765 |
| 5.1.2 gross motoric movement         | 0   |
| 5.1.3 interacting using feet         | 0   |
| 5.2 taste                            | 1   |
| 5.3 bodily motion in space           | 181 |
| 5.3.1 motion on the floor            | 0   |
| 5.3.2 around an artefact             | 0   |
| 5.3.2.1 reaching or bending over     | 0   |
| 5.4 vision                           | 89  |
| 6 Bodily interaction                 | 0   |
| 6.1 reaching                         | 1   |
| 6.2 bending over                     | 1   |
| 6.3 rolling on the floor             | 3   |
| 6.4 sitting on or next to artefact   | 15  |
| 6.5 crawling                         | 9   |
| 6.6 lying on the floor               | 7   |
| 6.7 physical gestures                | 0   |
| 6.8 bodily motion around an artefact | 0   |
| 6.9 tapping                          | 2   |
| 6.10 pointing to artefact            | 8   |
| 6.11 shape exploration               | 3   |
| 6.12 walk around                     | 5   |
| 6.13 licking                         | 1   |
| 6.14 kicking                         | 1   |
| 6.15 placing on the floor            | 63  |
| 6.16 attempt to move                 | 1   |
| 6.17 dancing                         | 2   |
| 6.18 shielding                       | 7   |
| 6.19 squeezing through               | 9   |
| 6.20 holding and placing             | 173 |
| 6.21 pushing                         | 248 |
| 6.22 lifting, carrying and placing   | 64  |
| 6.23 finger- or hand-tracing         | 5   |
| 6.24 observing                       | 82  |
| 6.25 throwing                        | 8   |
| 6.26 holding onto artefact           | 132 |
| 6.27 rubbing on body                 | 2   |

|                                         |     |
|-----------------------------------------|-----|
| 6.28 placing on body                    | 4   |
| 6.29 exploring action and effect        | 29  |
| 6.30 using fingers to press             | 88  |
| 6.31 picking up and holding             | 42  |
| 6.32 waving at                          | 4   |
| 7 Artefact role                         | 1   |
| 7.1 passage                             | 1   |
| 7.2 weight                              | 3   |
| 7.3 personification                     | 5   |
| 7.4 valuable                            | 32  |
| 7.5 scaffolding for play                | 60  |
| 7.6 hideout                             | 37  |
| 7.7 building blocks                     | 11  |
| 7.8 reinforcement                       | 40  |
| 7.9 divider/ wall                       | 326 |
| 7.10 support                            | 87  |
| 7.11 switch                             | 85  |
| 7.12 aid                                | 2   |
| 7.13 door                               | 196 |
| 7.14 border indicator                   | 114 |
| 7.15 area creation/indication/expansion | 172 |
| 7.16 decoration                         | 45  |
| 7.17 unknown                            | 39  |
| 7.18 obstacle                           | 27  |
| 7.19 toy                                | 112 |
| 7.20 furniture                          | 13  |
| 7.21 threshold crossing                 | 23  |
| 7.22 centerpiece                        | 11  |
| 8 Social Interaction                    | 0   |
| 8.1 inclusion                           | 0   |
| 8.1.1 collaborating                     | 57  |
| 8.1.1.1 cleaning up                     | 3   |
| 8.1.1.2 chatting                        | 9   |
| 8.1.2 forming groups                    | 4   |
| 8.1.3 allowing entry                    | 2   |
| 8.2 expressing values and affection     | 0   |
| 8.2.1 righteousness                     | 0   |
| 8.2.1.1 designated use                  | 0   |
| 8.2.2 observing others                  | 35  |
| 8.2.3 curiosity                         | 0   |

|                                            |    |
|--------------------------------------------|----|
| 8.2.3.1 gather around                      | 4  |
| 8.2.4 generosity                           | 0  |
| 8.2.4.1 giving object to another           | 8  |
| 8.2.4.2 exchanging objects                 | 1  |
| 8.2.5 affection                            | 0  |
| 8.2.5.1 soothing child                     | 1  |
| 8.2.5.2 hugging                            | 3  |
| 8.3 placemaking actions                    | 0  |
| 8.3.1 "stealing" from one group to another | 3  |
| 8.3.2 creating areas for retreat           | 0  |
| 8.3.2.1 hiding                             | 2  |
| 8.3.2.2 nesting                            | 34 |
| 8.4 playfulness                            | 0  |
| 8.4.1 teasing                              | 2  |
| 8.4.1.1 placing object onto another child  | 1  |
| 8.4.2 playing on floor                     | 4  |
| 8.4.3 pretend-play                         | 14 |
| 8.4.3.1 hierarchy                          | 1  |
| 8.4.4 chasing others                       | 1  |
| 8.4.5 running around                       | 4  |
| 8.4.6 mimicking                            | 36 |
| 8.5 calling for attention                  | 9  |
| 8.5.1 waving                               | 1  |
| 8.5.2 showing to other child/adult         | 12 |

## 1 Artefact benefits/drawbacks

### 1.1 Artefact benefits/drawbacks >> magic

### 1.2 Artefact benefits/drawbacks >> needed torches/lamps

### 1.3 Artefact benefits/drawbacks >> furnished the space with upholstery and billows

### 1.4 Artefact benefits/drawbacks >> build a house

### 1.5 Artefact benefits/drawbacks >> build a castle

**1.6 Artefact benefits/drawbacks >> conflicting needs**

**1.7 Artefact benefits/drawbacks >> police station**

**1.8 Artefact benefits/drawbacks >> hiding place**

**1.9 Artefact benefits/drawbacks >> role-playing**

**1.10 Artefact benefits/drawbacks >> better fitted for the gym**

**1.11 Artefact benefits/drawbacks >> no storage space**

**1.12 Artefact benefits/drawbacks >> shelves work better as partitions**

**1.13 Artefact benefits/drawbacks >> not for everyday**

**1.14 Artefact benefits/drawbacks >> not so sound proofing**

**1.15 Artefact benefits/drawbacks >> adding other toys to them**

**1.16 Artefact benefits/drawbacks >> useful but take up a lot of space**

**1.17 Artefact benefits/drawbacks >> build caves**

**1.18 Artefact benefits/drawbacks >> not well functioning**

**1.19 Artefact benefits/drawbacks >> inconsistency**

**1.20 Artefact benefits/drawbacks >> bulky**

**1.21 Artefact benefits/drawbacks >> lack of space**

**1.22 Artefact benefits/drawbacks >> noise absorbent**

**1.23 Artefact benefits/drawbacks >> used for building**

**1.24 Artefact benefits/drawbacks >> child reluctant/afraid to go near in the beginning**

**1.25 Artefact benefits/drawbacks >> collapsible**

## **2 Conflict**

cues indicating any conflict among the children

**2.1 Conflict >> exclusion**

**2.1.1 Conflict >> exclusion >> preventing exit**

**2.1.1.1 Conflict >> exclusion >> preventing exit >> imprisonment**

**2.1.2 Conflict >> exclusion >> preventing or obstructing interaction (entry/exit)**

cues where a child stops, prevents or obstructs other children's interaction(s) with the artefact

**2.1.2.1 Conflict >> exclusion >> preventing or obstructing interaction (entry/exit) >> pulling /pushing someone out**

**2.2 Conflict >> designated use**

**2.2.1 Conflict >> designated use >> undoing/correcting another child's action**

**2.3 Conflict >> kicking object**

**2.4 Conflict >> sense of ownership**

**2.4.1 Conflict >> sense of ownership >> trespassing**



**2.4.1.1 Conflict >> sense of ownership >> trespassing >> physical conflict**

**2.4.1.2 Conflict >> sense of ownership >> trespassing >> border protection**

**2.4.1.3 Conflict >> sense of ownership >> trespassing >> border "breach"**

**2.4.1.3.1 Conflict >> sense of ownership >> trespassing >> border "breach" >> shaking boards**

**2.4.2 Conflict >> sense of ownership >> attempt at taking object from another child**

**2.4.3 Conflict >> sense of ownership >> throwing object at/away from child**

### **3 Interaction with placemaking artefact**

**3.1 Interaction with placemaking artefact >> resting head on board**

**3.2 Interaction with placemaking artefact >> gathering connectors**

**3.3 Interaction with placemaking artefact >> placing object over the boards**

**3.4 Interaction with placemaking artefact >> placing boards around the projection arefact**

**3.5 Interaction with placemaking artefact >> moving board across the room**

**3.6 Interaction with placemaking artefact >> disconnecting the boards**

**3.7 Interaction with placemaking artefact >> bending over a board**

**3.8 Interaction with placemaking artefact >> touching the foam**

**3.9 Interaction with placemaking artefact >> reaching between/over the boards**

**3.10 Interaction with placemaking artefact >> moving connectors**

**3.11 Interaction with placemaking artefact >> removing connectors**

**3.12 Interaction with placemaking artefact >> stacking connectors**

**3.13 Interaction with placemaking artefact >> pushing the board**

**3.14 Interaction with placemaking artefact >> connecting boards together**

**3.15 Interaction with placemaking artefact >> lifting and carrying the boards**

**3.16 Interaction with placemaking artefact >> passing on / throwing object over or under board**

## **4 Interaction with projection artefact**

**4.1 Interaction with projection artefact >> placing markers in a row**

**4.2 Interaction with projection artefact >> looking at projector**

**4.3 Interaction with projection artefact >> throwing on floor**

**4.4 Interaction with projection artefact >> combining boards and markers**

**4.5 Interaction with projection artefact >> giving markers to another child**

**4.6 Interaction with projection artefact >> laying down in/ next to the projection**

**4.7 Interaction with projection artefact >> jumping into projection**

**4.8 Interaction with projection artefact >> stacking markers**

**4.9 Interaction with projection artefact >> moving body/walking over the projection**

**4.10 Interaction with projection artefact >> standing in projection**

**4.11 Interaction with projection artefact >> placing object in projected area**

**4.12 Interaction with projection artefact >> sitting on projection**

**4.13 Interaction with projection artefact >> moving hand over projection**

**4.14 Interaction with projection artefact >> touching markers**

**4.15 Interaction with projection artefact >> moving markers around**

**4.16 Interaction with projection artefact >> touching projection**

## **5 Modality**

With what modality do children interact with the artefact

**5.1 Modality >> bodily manipulation of an object**

**5.1.1 Modality >> bodily manipulation of an object >> fine motoric movement**

**5.1.1.1 Modality >> bodily manipulation of an object >> fine motoric movement >> interaction using hands**

any action that has to do with tactile interaction

**5.1.2 Modality >> bodily manipulation of an object >> gross motoric movement**

**5.1.3 Modality >> bodily manipulation of an object >> interacting using feet**

## **5.2 Modality >> taste**

## **5.3 Modality >> bodily motion in space**

moving one's body about in space

### **5.3.1 Modality >> bodily motion in space >> motion on the floor**

### **5.3.2 Modality >> bodily motion in space >> around an artefact**

#### **5.3.2.1 Modality >> bodily motion in space >> around an artefact >> reaching or bending over**

## **5.4 Modality >> vision**

any time children look at the artefact

## **6 Bodily interaction**

any cue relevant to bodily movement or interaction

### **6.1 Bodily interaction >> reaching**

### **6.2 Bodily interaction >> bending over**

### **6.3 Bodily interaction >> rolling on the floor**

### **6.4 Bodily interaction >> sitting on or next to artefact**

20.03.23 10:19 - Eleni

Merged with code Bodily interaction > sitting > sitting on artefact

### **6.5 Bodily interaction >> crawling**

### **6.6 Bodily interaction >> lying on the floor**

### **6.7 Bodily interaction >> physical gestures**

### **6.8 Bodily interaction >> bodily motion around an artefact**

**6.9 Bodily interaction >> tapping**

**6.10 Bodily interaction >> pointing to artefact**

any time evhildren point to or call for attention to the artefact

**6.11 Bodily interaction >> shape exploration**

**6.12 Bodily interaction >> walk around**

**6.13 Bodily interaction >> licking**

**6.14 Bodily interaction >> kicking**

**6.15 Bodily interaction >> placing on the floor**

**6.16 Bodily interaction >> attempt to move**

**6.17 Bodily interaction >> dancing**

**6.18 Bodily interaction >> shielding**

**6.19 Bodily interaction >> squeezing through**

**6.20 Bodily interaction >> holding and placing**

**6.21 Bodily interaction >> pushing**

**6.22 Bodily interaction >> lifting, carrying and placing**

**6.23 Bodily interaction >> finger- or hand-tracing**

**6.24 Bodily interaction >> observing**

**6.25 Bodily interaction >> throwing**

**6.26 Bodily interaction >> holding onto artefact**

**6.27 Bodily interaction >> rubbing on body**

**6.28 Bodily interaction >> placing on body**

**6.29 Bodily interaction >> exploring action and effect**

**6.30 Bodily interaction >> using fingers to press**

**6.31 Bodily interaction >> picking up and holding**

**6.32 Bodily interaction >> waving at**

## **7 Artefact role**

Any code that has to do with the artefact's changing role

**7.1 Artefact role >> passage**

**7.2 Artefact role >> weight**

**7.3 Artefact role >> personification**

**7.4 Artefact role >> valuable**

**7.5 Artefact role >> scaffolding for play**

**7.6 Artefact role >> hideout**

**7.7 Artefact role >> building blocks**

**7.8 Artefact role >> reinforcement**

**7.9 Artefact role >> divider/ wall**

**7.10 Artefact role >> support**

**7.11 Artefact role >> switch**

**7.12 Artefact role >> aid**

**7.13 Artefact role >> door**

**7.14 Artefact role >> border indicator**

**7.15 Artefact role >> area creation/indication/expansion**

**7.16 Artefact role >> decoration**

**7.17 Artefact role >> unknown**

code marking cues where we don't know the assigned role of the artefact

**7.18 Artefact role >> obstacle**

**7.19 Artefact role >> toy**

**7.20 Artefact role >> furniture**

**7.21 Artefact role >> threshold crossing**

## **7.22 Artefact role >> centerpiece**

artefact perceived as a centerpiece of action

## **8 Social Interaction**

codes referring to social cues among children

### **8.1 Social Interaction >> inclusion**

#### **8.1.1 Social Interaction >> inclusion >> collaborating**

##### **8.1.1.1 Social Interaction >> inclusion >> collaborating >> cleaning up**

##### **8.1.1.2 Social Interaction >> inclusion >> collaborating >> chatting**

#### **8.1.2 Social Interaction >> inclusion >> forming groups**

#### **8.1.3 Social Interaction >> inclusion >> allowing entry**

### **8.2 Social Interaction >> expressing values and affection**

#### **8.2.1 Social Interaction >> expressing values and affection >> righteousness**

##### **8.2.1.1 Social Interaction >> expressing values and affection >> righteousness >> designated use**

#### **8.2.2 Social Interaction >> expressing values and affection >> observing others**

#### **8.2.3 Social Interaction >> expressing values and affection >> curiosity**

##### **8.2.3.1 Social Interaction >> expressing values and affection >> curiosity >> gather around**

#### **8.2.4 Social Interaction >> expressing values and affection >> generosity**



**8.2.4.1 Social Interaction >> expressing values and affection >> generosity >> giving object to another**

**8.2.4.2 Social Interaction >> expressing values and affection >> generosity >> exchanging objects**

**8.2.5 Social Interaction >> expressing values and affection >> affection**

**8.2.5.1 Social Interaction >> expressing values and affection >> affection >> soothing child**

**8.2.5.2 Social Interaction >> expressing values and affection >> affection >> hugging**

**8.3 Social Interaction >> placemaking actions**

**8.3.1 Social Interaction >> placemaking actions >> "stealing" from one group to another**

**8.3.2 Social Interaction >> placemaking actions >> creating areas for retreat**

**8.3.2.1 Social Interaction >> placemaking actions >> creating areas for retreat >> hiding**

**8.3.2.2 Social Interaction >> placemaking actions >> creating areas for retreat >> nesting**

**8.4 Social Interaction >> playfulness**

**8.4.1 Social Interaction >> playfulness >> teasing**

**8.4.1.1 Social Interaction >> playfulness >> teasing >> placing object onto another child**

**8.4.2 Social Interaction >> playfulness >> playing on floor**

**8.4.3 Social Interaction >> playfulness >> pretend-play**

#### **8.4.3.1 Social Interaction >> playfulness >> pretend-play >> hierarchy**

children make use of a social hierarchy in their actions

#### **8.4.4 Social Interaction >> playfulness >> chasing others**

#### **8.4.5 Social Interaction >> playfulness >> running around**

#### **8.4.6 Social Interaction >> playfulness >> mimicking**

children performing the same activity or mimicking each other

#### **8.5 Social Interaction >> calling for attention**

cues related to children calling for others' attention

##### **8.5.1 Social Interaction >> calling for attention >> waving**

##### **8.5.2 Social Interaction >> calling for attention >> showing to other child/adult**
